# Supplementary material for: Assessing the Reliability of YouTube as a Patient Education Tool for Assisted Reproductive Technologies
Source: Research Square preprint supplement (doi:10.21203/rs.3.rs-5971278/v1), 2025-05-22
Supplement: Supplementary file 1 [file 550b4660b585178334c8a183.xlsx]

## Sheet: Sheet1
video_id	kanal_group	author	dil-not	title	channel_id	description	country	channel_keywords	subscribers	views	comments	likes	length	seconds	date_posted	days_passed	gqs	mod_discern	jama	azer_maj	azer_min
coebQxE1CIg	university hospital	Michigan Medicine	Animasyon yok, ders gibi	Understanding Male Infertility	UCfp5MBK2IC90Bdm5IQUJvYw	Creating the future of health care through scientific discovery and innovations in education while providing the most effective and compassionate care. www.UofMHealth.org Facebook: http://on.fb.me/michiganmedicine Twitter: @umichmedicine	N/A	"Medical School" medicine research science health cancer cardiovascular pediatrics michigan UMHS	200000	33304	86	272	00:55:55	3355	2019-03-20	2042	4	4	2	8	4
vHWHmAEiOeI		Magnet Brains	not english	Class 12 Biology Ch 4 | Assisted Reproductive Technologies (ART)- Reproductive Health NEET 2022-23	UC3HS6gQ79jjn4xHxogw0HiA	We are India's leading Ed-Tech platform providing 100% high-quality education across India in both English and Hindi medium. We relentlessly work to deliver the most strategic and innovative learning solutions from the best-in-class faculties. With the aim of making education accessible to all, we are a one-stop solution for all your academic preparations from Kindergarten to 12th CBSE, Hindi med…	IN	"free online lectures" "class 12 free online classes" "class 11 free online classes" "class 10 free online classes" "class 9 free online classes" "class 8 free online classes" "class 10 lectures" "class 9 lectures" "class 8 lectures" "class 7 lectures" "class 6 lectures" "class 5 lectures" "class 4 lectures" "class 3 lectures" "class 2 lectures" "class 1 lectures" "kindergarten lectures" "cbse le…	12600000	70691	105	1986	00:55:02	3302	2021-10-04	1113
coebQxE1CIg	doctor independent influencer	Prof. Suresh Bada Math	açıklama güncel değil, ders gibi	The Assisted Reproductive Technology (Regulation) Act, 2021 [Art Act, 2021]	UCt3R1upNvfkHkEN3PzwubHA	Welcome to @sureshbadamath, your go-to channel for profound insights on mental health and medicolegal issues. I'm Dr. Suresh Badamath, driven by a passionate deeply committed to the profound wisdom of the 'Karmanye Vadhikaraste' Sloka from the Bhagavad Gita. This sacred teaching inspires us to perform our duties with dedication, free from attachment to the outcomes. As intellectuals, we bear a sa…	IN	"Suresh Bada Math" sureshbm "suresh nimhans" bmsuresh "Badamath suresh" "Math SB" "Forensic Psychiatrist" Telemedicine medicolegal "suresh bm" "suresh badamath" "Dr Suresh BM" "Prof Suresh BM" "Dr Suresh Bada Math" "Prof Suresh Bada Math" "Dr Suresh Badamath" "Prof Suresh Badamath" SBM BMS "Nimhans Doctors" "Doctors in Bangalore" "Psychiatrist in Bangalore" "Famous psychiatrist" "Popular Psychiat…	42000	9219	18	144	00:46:50	2810	2022-01-05	1020	3	5	2	8	4
ZgH1qsZKZs8	doctor independent influencer	Ben Bikman	Ders gibi kendi reklamı	The Metabolism of Male Infertility with Dr. Ben Bikman	UCblbxPFG0XAsQA2LwzT6xDQ	For years, as a scientist, my research has focused on the foundational role of metabolic health in controlling body weight and reducing the risk of chronic disease. Understanding how the interaction of calories and hormones affects our metabolic health has become the cornerstone of my work. I’ve had the privilege of sharing this message with people across the globe, helping them understand the pr…	US	N/A	84000	12027	51	616	00:34:17	2057	2024-04-18	186	3	5	2	8	5
nK1jiAlatMY	university hospital	Penn Medicine	Haber belgesel	Single Mom by Choice: An IVF Journey	UC36Nlm8ikeZ4tDRx__BjJnA	Welcome to Penn Medicine's Youtube channel, where you'll find everything from health tips and advice to doctor profiles to patient stories, and much more. Subscribe now for all our latest videos: http://bit.ly/1W2TbMY This channel is constantly updated with new videos that will educate, inform, and entertain...all while giving you a closer look at the people, places, and events that make Penn Med…	US	"penn medicine" "university of Pennsylvania" "Philadelphia hospital" "academic medical center" "clinical trials" "penn hospital" "Upenn hospital" pennmedicine "philly hospital" "best hospital philadelphia" "top hospital philadelphia" "top ranked hospital" "ask a doctor" "patient videos" "medical explainers" healthcare "philadelphia doctor" "organ transplant" immunotherapy immunorevolution crispr …	69400	379474	883	5487	00:28:32	1712	2019-02-04	2086	4	4	3	8	4
gIGszaQhySs	doctor independent influencer	Strong Medicine		An Approach to Female Infertility	UCFq5vPnNRNNNysLrktz4aSw	Educational videos on a variety of medical topics, produced by Eric Strong - a hospitalist and Clinical Associate Professor of Medicine at Stanford University. Questions are welcome, but I cannot dispense specific medical advice on here about an individual's medical problems. It's always best to consult a medical professional in person for any symptom or physical ailment. Comments which promote a…	US	stanford medicine lectures medical videos video education ekg abg antibiotics heart ventilation electrolytes foam meded mcat ecg "medical school" "nursing school" "pa school" "clinical reasoning" "chest X-ray" cxr "med ed" "med school" osmosis onlinemeded "online med ed" ecg	725000	21320	31	423	00:26:39	1599	2022-01-04	1021	3	4	2	8	4
E0PeAsNdKug	doctor independent influencer	NEET Biology Expert		Assisted Reproductive Technology | NCERT Class 12 Biology	UCkbHIv9PzhGyVxa7sGi9JpA		IN	"NEET Biology Lectures" "NCERT Biology" "Class 12 Biology TamilNadu" "NEET in Tamil" "plus 2 biology lectures" "plus one biology" "Class 11 Biology lectures Tamil" "NEET Crash Course" "NEET Teaching academy" "JIPMER AIIMS NEET Preparation" "Simple Biology in Tamil" "NEET preparation in English" "NEET preparation in Malayalam" NCERT "NCERT Books" "NCERT preparation for UPSC" "NCERT science class 1…	10900	16520	22	393	00:23:53	1433	2020-10-28	1454	4	4	2	8	5
uD_ZlMxwTSo	doctor independent influencer	Lora Shahine, MD	Atıf var	Learn About the IVF Timeline and How Long It Really Takes to Have a Baby - Dr Lora Shahine	UCaLy_dPlBufEjzP7_agJ9lA	Educating and supporting on your family building journey. Double board certified reproductive endocrinologist and OBGYN helping people build families for over 20 Years. I struggled with infertility myself and wanted to create a channel full of information I wish I had on my own journey. Here you’ll find educational content on fertility, miscarriage, emotional wellness, and lifestyle optimization.…	US	"Dr Lora Shahine" "ivf doctor tips dr lora shahine" "ivf success tips dr lora shahine" "doctor tips and ivf dr lora shahine" "things you need to know before starting ivf dr lora shahine" "top tips for ivf success dr lora shahine" #fertility "ivf journey dr lora shahine" "woman infertility" "womans health" infertility "youtube doctor" "fertility specialist" "fertility doctor" "ivf doctor" "ivf spe…	79700	78610	143	1134	00:23:25	1405	2023-03-03	598	5	5	4	10	4
yyUWVvc-tOM	doctor independent influencer	Strong Medicine		An Approach to Male Infertility	UCFq5vPnNRNNNysLrktz4aSw	Educational videos on a variety of medical topics, produced by Eric Strong - a hospitalist and Clinical Associate Professor of Medicine at Stanford University. Questions are welcome, but I cannot dispense specific medical advice on here about an individual's medical problems. It's always best to consult a medical professional in person for any symptom or physical ailment. Comments which promote a…	US	stanford medicine lectures medical videos video education ekg abg antibiotics heart ventilation electrolytes foam meded mcat ecg "medical school" "nursing school" "pa school" "clinical reasoning" "chest X-ray" cxr "med ed" "med school" osmosis onlinemeded "online med ed" ecg	725000	44851	30	812	00:20:34	1234	2022-01-09	1016	3	4	2	8	4
xNmX3tBeC58	non-government organization	Progyny	Açıklama çok az	IVF Procedure Step by Step - Part 3	UCxjpBP09OnyISjeHE4M7pTA	Progyny’s YouTube Channel is an educational resource for anybody interested in learning more about the causes of infertility and the many treatments and paths available to those who need support in building their family. Join us as we dive into these topics with the most brilliant minds in the fields of reproductive endocrinology and embryology.	US	"Fertility Benefits" infertility fertility "how to get pregnant" pcos endometriosis treatments ovulation "reproductive endocrinologists" ivf "in vitro fertilization" invitro progesterone injections	7510	110860	86	755	00:18:14	1094	2022-12-01	690	3	3	2	8	5
bTkkgtLQ5Sg	non-government organization	Progyny	Açıklama çok az	IVF Procedure Step by Step - Part 1	UCxjpBP09OnyISjeHE4M7pTA	Progyny’s YouTube Channel is an educational resource for anybody interested in learning more about the causes of infertility and the many treatments and paths available to those who need support in building their family. Join us as we dive into these topics with the most brilliant minds in the fields of reproductive endocrinology and embryology.	US	"Fertility Benefits" infertility fertility "how to get pregnant" pcos endometriosis treatments ovulation "reproductive endocrinologists" ivf "in vitro fertilization" invitro progesterone injections	7510	71588	30	352	00:16:25	985	2022-12-01	690	3	3	2	8	5
qLHboykE8do		GS Medical Academy	not english	Female Infertility in Hindi | Causes And Treatment of Female Infertility | ART & IVF in Hindi	UCVZ2pVKHqw5D3geyz7hmV5w	Business - ghanshyammedicalinfo@gmail.com Hellow Friends Welcome to "GS Medical Academy" My Self Ghanshyam kushwaha My Studied -- King George Medical University Lucknow Utter Pradesh Our lectures are very useful for medical, nursing, paramedical, pharmacy, physiotherapy students and all medical practitioners. Here all the topics are explained in a very simple way and correct information is given …	IN	"nursing job preparation" "Nursing officers preparation" "Nursing students" "Medical students" "Medical surgical nursing in Hindi" "Bsc nursing lecture in Hindi" "Bsc nursing students" "JNM students" "Health care provider" "Medical classes" "Ghanshyam Medical Classes" "GS Medical Academy" "gs medical academy" "gs medical classes" "GS MEDICAL ACADEMY" @gsmedicalacademy "GS Medical Academy" "GS Nur…	90900	57199	65	1688	00:15:47	947	2023-03-24	577
T-ebKv4hqHY	news/media	TVC News Nigeria	bitkisel beslenme uzmanı haber	How to cure Male Infertility	UCgp4A6I8LCWrhUzn-5SbKvA	TVC News is Africa's foremost news source, providing compelling and unparalleled content to an evolving audience. We are dedicated to informing, engaging, and empowering our audience with the latest and most reliable news. Operating 24/7, our committed team at TVC News across the country and around the world delivers comprehensive coverage on politics, health, business, entertainment, the environ…	NG	TV News Channels TVC TVCNEWS tvcnews.tv tvcnewsnigeria breakingnews "nigeria news" "tv live streaming" "news at 10" "live streaming" "tvc channel" "tvc news" "tvc nigeria" "news in nigeria" "tvc news at 10" "tvc live stream" "Breaking News" "Latest Updates" "Top Stories" "Trending News" "Current Events" "News Analysis" "Global News" "Political News" "Business News" "Technology News" "Entertainmen…	1240000	29277	44	244	00:15:24	924	2019-10-03	1845	2	3	1	8	4
_fZ4_Rt2UPI	news/media	The Economist	Haber	Fertility crisis: why IVF isn't working	UC0p5jTq6Xx_DosDFxVXnWaQ	The Economist videos give authoritative insight and opinion on international news, politics, business, finance, science, technology and the connections between them. We're also producing full films such as The Disrupters, an original series exploring how major industries—from music and cars to hospitality—are currently being disrupted by the latest wave of digital innovation. As well as enjoying …	GB	"The Economist" news politics "world affairs" economist magazine business finance science technology arts history	3420000	129046	371	2557	00:14:44	884	2023-07-20	459	3	4	3	10	4
jkvebGd2MTo	non-government organization	Shady Grove Fertility	Kaynak olarak kendi haberleri	Male Infertility Causes and Treatments | Fertility Doctor Explains	UCRv_oz2lKhoJbQVMCquAIyA	Shady Grove Fertility is a Center of Excellence in the field of reproductive medicine, IVF, and infertility. “The patient comes first” is at the center of our philosophy at Shady Grove Fertility. We fervently believe that any decision we make from the perspective of serving the patient will ultimately be the best choice. For people struggling to conceive, seeing a fertility specialist sooner lead…	N/A	"Shady Grove Fertility" "fertility center" "fertility clinic" "trying to conceive" "donor egg" "in vitro fertilization" IUI IVF infertility fertility	33200	55584	42	498	00:14:27	867	2019-11-12	1805	4	4	2	8	4
gd9N1eHcmss	independent influencer	Fruitful: My Fertility Journey		IVF Process Step by Step + What I wish I knew!	UCFcxiawBudKpLpBwrBS7EzQ	The idea for Fruitful was birthed when I searched online for information about infertility, but found very few resources within the minority community. Infertility is an issue that affects millions of minority women (and couples) yet, people are not comfortable discussing the topic. My channel consists of infertility support, encouragement and tips to help those in the wait! I also share videos a…	US	Infertility Fruitful Baby IVF IUI Fertililty Journey Pregnant Pregnancy Miscarriage Vlog Black "ivf success" tips "best ivf video" "ivf tips" miscarriage "9 months"	14300	183617	312	2710	00:14:22	862	2018-04-01	2395	2	2	1	8	4
DxHPvGPKTRA	non-government organization	Vaidam	Hastane ve doktor linki paylaşılmış	Female Infertility - Best Explained by Dr. Parul Katiyar from ART Fertility Clinics, New Delhi	UCHh2QDCBr0IxT67L_uyr5IQ	Founded in 2016, Vaidam Health is world's leading healthcare platform that connects patients to top-notch doctors and trusted hospitals and assists patients at every step of their medical treatment journey. Vaidam is ISO certified & NABH accredited (National Accreditation Board for Hospitals & Healthcare Providers Accreditation, NABH is regarded as the highest national recognition for quality pat…	N/A	vaidam "medical tourism in india" "medical tourism" "medical travel to india" "patient testimonial" "treatment in india" "hospitals in india" "doctors in india" "medical treatment in india" "medical tourism" "medical treatment in turkey" "medical tourism turkey" "medical treatment in dubai" "medical tourism dubai" "medical treatment in germany"	37100	13636	10	123	00:14:13	853	2021-08-26	1152	4	4	2	8	4
JhmTvH3trPQ	doctor independent influencer	Armando Hasudungan	Kaynak paylaşmış	Gynaecology - Infertility in Women (causes and pathophysiology)	UCesNt4_Z-Pm41RzpAClfVcg	I am specialising in Rheumatology with a passion for medical education and illustration. I make these videos because they help me learn and I hope then can help you too :) Support me: http://armandoh.org/shop OR become a long term member. Mailing: PO BOX 166 Randwick NSW 2031 Australia	AU	armando hasudungan "medical education" "medical videos" "medical student videos" "medical illustration"	2660000	282551	232	4429	00:13:39	819	2017-09-01	2607	4	3	2	10	5
sHXYulkc3S4	doctor independent influencer	Natalie Crawford, MD	Kendi reklamı	What is IVF? Step by Step of the IVF Process to Get Pregnant	UCRZamIB-DWuVPJuc0bKhwzg	Hey friends!! I'm Natalie and I'm thrilled to have you here! Welcome to my YouTube channel. I am a fertility doctor in Austin, Texas, co-founder of a boutique fertility practice, Fora Fertility, and I am the host of the As a Woman Podcast. This is a space to learn about your body and your fertility and empower you to make the best decision for your future. Thanks for stopping by, I hope you subsc…	US	fertility infertility doctor medicine lifestyle "as a woman" health wellness "female empowerment"	194000	111352	85	1298	00:13:20	800	2022-11-30	691	4	4	3	8	4
w4W20MImjOA	doctor independent influencer	Dr. Marc Sklar - FertilityTV	Kendi reklamı	Secondary Infertility TREATMENT - Trying to Conceive	UCckJrww4bImdjwPFvr631zA	Best tips to help you get pregnant by The Fertility Expert The youtube channel dedicated to helping you improve your fertility and get pregnant. Let’s be honest, If what you were doing to get pregnant was working, you’d have a baby by now. You need a different approach to your health and fertility,.. And that’s what Fertility TV is about! So let me ask you... Are you trying to conceive over the a…	US	"The Fertility Expert" "Marc Sklar" "How To Get Pregnant" Fertility "Trying to Conceive Naturally" "Fertility Tips" "Get Pregnant Naturally"	332000	7942	46	209	00:13:20	800	2022-04-26	909	4	4	3	8	4
ZrqtpmZlgF8	news/media	BBC News	Açıklama çok az	Male infertility: The secret shame of having no sperm - BBC News	UC16niRr50-MSBwiO3YDb3RA	Welcome to the official BBC News YouTube channel. Interested in global news with an impartial perspective? Want to see behind-the-scenes footage directly from the front-line? Our YouTube channel has all this and more, bringing you specially selected clips from the world's most trusted news source. For the latest news and analysis download the BBC News app or visit BBC.com.	GB	BBC News Official YouTube Channel	17100000	96268	405	782	00:12:31	751	2018-09-19	2224	3	3	2	8	4
0ZCEEY0cecA	education	Zero To Finals	Amazonda tıp kitaplarına yönlendirme	Understanding Infertility Causes and Investigations	UCwZEjeak8ychtv2Unng5W2A	The Zero to Finals channel was created specifically to help students of medicine and other health professions to learn difficult concepts and conditions in preparation for their exams. Medicine book: https://www.amazon.co.uk/dp/1091859892 Paediatrics book: https://www.amazon.co.uk/dp/1080142827 Obstetrics and Gynaecology book: https://www.amazon.co.uk/dp/B08K4K2WQB Website: https://www.zerotofina…	GB	Medical Student Medicine Education Science Nursing Physiology Pharmacology	880000	230709	255	5045	00:12:25	745	2018-07-28	2277	3	4	2	10	5
MQEol-7db2I	non-government organization	Progyny	Açıklama çok az	IVF Procedure Step by Step - Part 2	UCxjpBP09OnyISjeHE4M7pTA	Progyny’s YouTube Channel is an educational resource for anybody interested in learning more about the causes of infertility and the many treatments and paths available to those who need support in building their family. Join us as we dive into these topics with the most brilliant minds in the fields of reproductive endocrinology and embryology.	US	"Fertility Benefits" infertility fertility "how to get pregnant" pcos endometriosis treatments ovulation "reproductive endocrinologists" ivf "in vitro fertilization" invitro progesterone injections	7510	46673	10	252	00:12:05	725	2022-12-01	690	3	3	2	8	5
3GrzZ5KpPTs	doctor independent influencer	HOW TO MEDICATE	Kaynak paylaşmış	Female Infertility Explained - Causes, Tips and Treatment	UC0RTYgQBbafZfab1iLFrtBg	Hello, My name is Raoul, I am a medical doctor from the Netherlands and I am making weekly medical videos to educate myself as well as you my viewer. Because I believe that educated people, make healthier decisions. And that is what this channel is all about. Feel free to subscribe for future videos and thank you for watching! DISCLAIMER: The content seen in my videos and the comments are provide…	US	"how to medicate" howtomedicate "how to use medication" "how to use medicine" "medical doctor" "when to use medication" "medical channel" "medical facts" "medical videos" "tips medical doctor" "doctor reacts" "doctor explains" "medication made easy" "doctor raoul" "medical facts doctor" "safety of medication" "health tips" "doctor raoul" "medical doctor raoul" medication drugs medicine diseases d…	202000	5221	10	102	00:11:22	682	2023-01-11	649	5	5	4	10	5
eJQXGbci6HA	doctor independent influencer	Natalie Crawford, MD	Kendi reklamı	Unexplained Infertility: A Fertility Doctor Explains the Treatment Options	UCRZamIB-DWuVPJuc0bKhwzg	Hey friends!! I'm Natalie and I'm thrilled to have you here! Welcome to my YouTube channel. I am a fertility doctor in Austin, Texas, co-founder of a boutique fertility practice, Fora Fertility, and I am the host of the As a Woman Podcast. This is a space to learn about your body and your fertility and empower you to make the best decision for your future. Thanks for stopping by, I hope you subsc…	US	fertility infertility doctor medicine lifestyle "as a woman" health wellness "female empowerment"	194000	38437	164	790	00:10:34	634	2020-12-04	1417	4	4	3	8	4
fy61qs_tXTQ	doctor independent influencer	Armando Hasudungan	Kaynak paylaşmış	In Vitro Fertilization (IVF) - Overview	UCesNt4_Z-Pm41RzpAClfVcg	I am specialising in Rheumatology with a passion for medical education and illustration. I make these videos because they help me learn and I hope then can help you too :) Support me: http://armandoh.org/shop OR become a long term member. Mailing: PO BOX 166 Randwick NSW 2031 Australia	AU	armando hasudungan "medical education" "medical videos" "medical student videos" "medical illustration"	2660000	138176	78	2263	00:10:18	618	2017-09-02	2606	4	3	2	10	5
tpb3qxOxEao	hospital	Jindal Hospital & Fertility Center	Kendi reklamı	Unexplained Infertility treatment| Dr. Anshu Jindal| Jindal Hospital	UCRWvcni5TKF1pCazEvOH7gQ	We are Dr Anshu & Sunil Jindal on a mission to give 100,000 couples the joy of parenthood. We are reproductive medicine specialists & take care of both men & womens reproductive & sexual health. In the last 20 years, it's a blessing that we have been able to give more than 10,000 couples the joy of parenthood, including a few world records. We are trained in the top institute of the country. We h…	IN	"jindal hospital" "fertility training" "infertility advice" "corona virus" "best ivf centre" "iwant a baby" "best andrology centre" "cost of ivf" "ivf doctor" "dr sunil jindal" "dr anshu jindal" "best tesa icsi" "best ivf" "best ivf package" "advanced fertility treatement" "ivf super speciality" ivf Icsi	2210000	43283	249	1547	00:10:06	606	2021-09-27	1120	4	4	2	8	5
z4avROtnYwM	non-government organization	The Yoga Institute	Alternatif Tıp	Infertility Treatment | Treat Your Infertility for Pregnancy | Treat Infertility With Yoga	UCihUiDJzjyo2ov_qGtW33lw	Founded in 1918 by Shri Yogendraji, The Yoga Institute is the oldest organized yoga center in the world. With a legacy of over 102 years, we have trained over 1 lakh yoga teachers globally, revolutionizing the lives of millions through our simple, yet powerful yogic techniques. Profound with timeless wisdom, our books have become a part of the Crypt of Civilization. The Father of Modern Yoga Rena…	IN	Yogic TheYogaInstitute Health "Yoga for health" Asanas "Yoga Institute" "Dr Hansaji Yogendra" "Dr Hansaji" Hansaji JayadevaJi "Hansa Maa" YogendraJi "Yoga Guru" "The Yoga Institute" "Yoga For Beginners" Yoga Fitness "Oldest Yoga Institute" "Worlds Oldest Yoga Institute" "Yoga Museum" "Yoga teacher Training Course" ttc "Yoga everyday" "Yoga Asanas" "Yoga Daily" "Health and disease" "cure with yoga…	4630000	589823	282	8635	00:09:39	579	2023-03-24	577	4	3	2	8	4
BZje6--wir8	doctor independent influencer	Lora Shahine, MD	Kendi reklamı	How Expensive is IVF Really? Ideas for Funding Your Fertility Treatment - Dr Lora Shahine	UCaLy_dPlBufEjzP7_agJ9lA	Educating and supporting on your family building journey. Double board certified reproductive endocrinologist and OBGYN helping people build families for over 20 Years. I struggled with infertility myself and wanted to create a channel full of information I wish I had on my own journey. Here you’ll find educational content on fertility, miscarriage, emotional wellness, and lifestyle optimization.…	US	"Dr Lora Shahine" "ivf doctor tips dr lora shahine" "ivf success tips dr lora shahine" "doctor tips and ivf dr lora shahine" "things you need to know before starting ivf dr lora shahine" "top tips for ivf success dr lora shahine" #fertility "ivf journey dr lora shahine" "woman infertility" "womans health" infertility "youtube doctor" "fertility specialist" "fertility doctor" "ivf doctor" "ivf spe…	79700	15481	42	235	00:09:21	561	2021-10-22	1095	4	4	2	8	4
37ZxTMWFOdM	doctor independent influencer	Natalie Crawford, MD	Kendi reklamı	Does the COVID Vaccine Cause Female Infertility or Sterilization?	UCRZamIB-DWuVPJuc0bKhwzg	Hey friends!! I'm Natalie and I'm thrilled to have you here! Welcome to my YouTube channel. I am a fertility doctor in Austin, Texas, co-founder of a boutique fertility practice, Fora Fertility, and I am the host of the As a Woman Podcast. This is a space to learn about your body and your fertility and empower you to make the best decision for your future. Thanks for stopping by, I hope you subsc…	US	fertility infertility doctor medicine lifestyle "as a woman" health wellness "female empowerment"	194000	63199	389	1279	00:08:26	506	2020-12-10	1411	4	4	3	8	4
4YlhJETK9xY	news/media	Cheddar	Detaylı kaynak paylaşmış	The Truth About &quot;Rising&quot; Male Infertility - Cheddar Explains	UC04KsGq3npibMCE9Td3mVDg	Bringing you the latest in financial news and tech coverage. 📈💡 Check-out cheddar.com to learn more and find out where to watch us! Don't forget: Follow us on our other social media channels for more great exclusive content.	US	cheddar business technology news education documentary explainer companies history facts	929000	291726	1147	10791	00:08:19	499	2022-01-06	1019	5	5	3	10	4
E5W2CjeoaUk	doctor independent influencer	Infertility TV	Kendi ve klinik reklamı	IVF Why embryos don't stick (and what you can do about it)	UCNdUjmPUmBIKuHB3uOq5S3g	Infertility TV is your trusted source for reliable, accurate answers to questions about infertility and miscarriage. Infertility TV is hosted by Dr. Randy Morris MD, America's Most Trusted Fertility Expert. Dr. Morris is Board Certified in Reproductive Endocrinology and Infertility and Obstetrics and Gynecology by the American Board of Obstetrics and Gynecology (ABOG). Click the ABOG link below f…	US	IVF "in vitro fertilization" Infertility fertility PGD "Dr Randy Morris" "Randy Morris MD" "fertility expert" PCOS Crinone Clomid Endometriosis TTC "Trying to Conceive" "TTC Tips" "Chicago IVF" "Illinois IVF" "IVF Success" "IVF Journey" "IVF treatment" "Fertility treatment" PGT	284000	1710334	541	18584	00:07:24	444	2019-11-14	1803	3	3	2	8	4
pTVtYgSHDtI	independent influencer	Animated biology With arpan	Ders videoları serisi ama kaynak yok	In Vitro fertilization | IVF | Process of in vitro Fertilization | How IVF is performed? |Embryology	UClpeLlEHyJOcPQPxXUwwomA	Understanding biology and medicine can be challenging, but our animations make it easy and engaging. These captivating visual aids will help you grasp the concepts more effectively. Dont forget to check out our website for MCQ question practice Website link: https://animatedbiologywitharpan.graphy.com Creators of this channel Creator and animator: Dr. Arpan Parichha (Ph.D. ) ## Dr. Arpan Parichha…	IN	"animated biology" "animated biology with arpan" "biology with animations" arpan "arpan parichha" "cell biology" immunology microbiology career Education "Exam strategies" "Life sciences" biology CSIR NET genetics "developmental biology" zoology "molecular biology" MSc "molecular biology" ecology science neurobiology "biology exam" biochemistry biotechnology biotechniques microscopy techniques TI…	294000	15999	18	240	00:07:18	438	2024-04-21	183	3	2	2	8	5
5jQsaKJf3ic	news/media	BBC Global	açıklama çok az	Fertility crisis: Is modern life making men infertile? - BBC REEL	UCfYW5GXBXueSO5p9bxD45qg	The best short videos and explainers from the BBC. This is a commercial channel from BBC Studios.	GB	"BBC Reel" BBC "BBC News" factual video news history science culture learn psychology environment people world travel philosophy documentary documentaries explainer explainers ideas	577000	1837582	6394	30983	00:07:05	425	2022-03-05	961	3	3	2	8	4
UTZKFfEdv20	non-government organization	Medical Centric	Açıklama güncellenmemiş	Infertility, Causes, Signs and Symptoms, Diagnosis and Treatment.	UC-_aWEhUBpH86D1VR0OhVrw	If you are looking for a great source of medical information and resources, then our YouTube channel is the right place for you! Our channel offers helpful medical information and advice on a variety of topics, ranging from medical treatments and procedures to healthy lifestyle tips. We cover everything from nutrition to disease prevention and management. Our videos are easy to understand and pro…	CA	health medicaltips	552000	75038	16	901	00:06:51	411	2021-05-11	1259	3	2	2	8	4
qKAOkYMycH4	hospital	Yashoda Hospitals - Hyderabad	Hastane linki	Infertility in Men and Women: Causes, Diagnosis, and Treatment | Infertility Treatment for Women	UCkni3gAkLrc-LR9TDfRm31Q	Established in 1989, Yashoda Hospitals has been at the forefront of healthcare for over 30 years. As a leading quaternary healthcare provider, we have evolved as a center of excellence over the years and continuously strive to provide the highest quality medical treatments for patients with diverse medical needs. Our facilities comprise 4 Independent Hospitals and a Multiorgan Transplant Departme…	IN	health "health tips" "telugu health tips" "health care" "medical information" "daily health tips" "health channel" "patient education" "health literacy" symptoms diagnose treatment "how to" "life style" telugu "patient education in telugu" "yashoda hospital" "yashoda hospital hyderabad" "yashoda hospital secunderabad" "yashoda hospital somajiguda" "yashoda hospital malakpet" "hyderabad yashoda ho…	169000	152568	100	1407	00:06:48	408	2019-07-10	1930	4	3	3	8	5
P27waC05Hdk	education	TED-Ed	Seminer	How in vitro fertilization (IVF) works - Nassim Assefi and Brian A. Levine	UCsooa4yRKGN_zEE8iknghZA	TED-Ed’s mission is to create lessons worth sharing. Feed and expand your curiosity with our award-winning animated shorts - published on YouTube and available with supplemental learning materials on ed.ted.com. Want to suggest an idea for a TED-Ed animation, nominate an educator or animator? Visit our website at: http://ed.ted.com/get_involved. Consider backing us on Patreon. By doing so, you di…	US	TED TED-Ed TEDEd "TED Education" animation "animated videos" history math science myths riddles literature poetry psychology education "mental health" health space biology physics brain animals music philosophy	20700000	3155754	1663	42319	00:06:43	403	2015-05-07	3455	4	3	2	8	5
ruDIV8Z7GAQ	doctor independent influencer	Infertility TV	Kendi ve klinik reklamı	IVF: More eggs or less? What's best for fresh vs frozen transfer?	UCNdUjmPUmBIKuHB3uOq5S3g	Infertility TV is your trusted source for reliable, accurate answers to questions about infertility and miscarriage. Infertility TV is hosted by Dr. Randy Morris MD, America's Most Trusted Fertility Expert. Dr. Morris is Board Certified in Reproductive Endocrinology and Infertility and Obstetrics and Gynecology by the American Board of Obstetrics and Gynecology (ABOG). Click the ABOG link below f…	US	IVF "in vitro fertilization" Infertility fertility PGD "Dr Randy Morris" "Randy Morris MD" "fertility expert" PCOS Crinone Clomid Endometriosis TTC "Trying to Conceive" "TTC Tips" "Chicago IVF" "Illinois IVF" "IVF Success" "IVF Journey" "IVF treatment" "Fertility treatment" PGT	284000	84951	68	967	00:05:45	345	2021-04-08	1292	3	3	2	8	4
jr_xLdLOXH0	news/media	Virgin Media Television	İlk tüp bebekle röportaj	The World's First IVF Baby: Louise Brown Tells Her Story | The Six O'Clock Show	UCSs6lDsi723swfltNt9PSiA	Welcome to the official Virgin Media Television YouTube Channel. Here you will find some of our favourite clips, highlights and teasers of our up coming shows.	IE	"Virgin Media Ireland" "Ireland AM" "The Guards" "The Guards" "Gogglebox Ireland" #GoggleboxIRL "The Tonight Show" #TonightVMTV "Vicky Phelan" "Virgin Media Television" "Six O'Clock Show" "Virgin Media" "Virgin Media TV" "Ireland AM" "tommy bowe" "virgin media sport" "virgin media" "brian dowling" "alan hughes" muireann "love island" "big brother" bgt "britain's got talent"	38000	23130	19	0	00:05:44	344	2022-07-24	820	4	4	2	10	4
QLGrmYgow8I	university	Demystifying Medicine McMaster	Açıklama çok az	Reasons for infertility	UCEwEYnO7yey-oBzyNu-AauQ	As vast amounts of complex scientific data related to the understanding of health and disease are published, there is an increasing need for effective knowledge translation efforts, to ensure a better understanding of the scope of the scientific findings and their limitations. The Demystifying Medicine McMaster program aims to contribute to a better understanding of the various concepts related t…	CA	"Demystifying Medicine" "McMaster University" NIH "Dr Fauci" Covid19 SarsCov2 "Dr Win Arias" "Dr Glass" Pandemic	172000	215959	274	1244	00:05:33	333	2018-10-23	2190	4	3	2	8	5
zp5-LA6u0QI	doctor independent influencer	Infertility TV	Kendi ve klinik reklamı	Best fertility treatment at age 35 and over	UCNdUjmPUmBIKuHB3uOq5S3g	Infertility TV is your trusted source for reliable, accurate answers to questions about infertility and miscarriage. Infertility TV is hosted by Dr. Randy Morris MD, America's Most Trusted Fertility Expert. Dr. Morris is Board Certified in Reproductive Endocrinology and Infertility and Obstetrics and Gynecology by the American Board of Obstetrics and Gynecology (ABOG). Click the ABOG link below f…	US	IVF "in vitro fertilization" Infertility fertility PGD "Dr Randy Morris" "Randy Morris MD" "fertility expert" PCOS Crinone Clomid Endometriosis TTC "Trying to Conceive" "TTC Tips" "Chicago IVF" "Illinois IVF" "IVF Success" "IVF Journey" "IVF treatment" "Fertility treatment" PGT	284000	134158	115	1893	00:05:15	315	2022-06-23	851	3	3	2	8	4
0ergLN41d7c	news/media	CBS Sunday Morning	Haber	Test tube baby Louise Brown and the birth of IVF	UCVT1tPkR-fUVlO652EcO3ow	"CBS Sunday Morning," hosted by Jane Pauley, is the #1 Sunday morning news program, featuring stories on the arts, music, nature, entertainment, history, science, sports and Americana, and highlighting unique human accomplishments and achievements. Check local listings for "CBS Sunday Morning" broadcast times. For licensing inquiries, contact: licensing@veritone.com	N/A	N/A	1590000	98913	35	439	00:05:12	312	2018-09-15	2228	3	3	2	8	4
a7bFiFA9Qt4	non-government organization	Shady Grove Fertility	Klinik reklamı	Overcoming Male Infertility: Our Success Story	UCRv_oz2lKhoJbQVMCquAIyA	Shady Grove Fertility is a Center of Excellence in the field of reproductive medicine, IVF, and infertility. “The patient comes first” is at the center of our philosophy at Shady Grove Fertility. We fervently believe that any decision we make from the perspective of serving the patient will ultimately be the best choice. For people struggling to conceive, seeing a fertility specialist sooner lead…	N/A	"Shady Grove Fertility" "fertility center" "fertility clinic" "trying to conceive" "donor egg" "in vitro fertilization" IUI IVF infertility fertility	33200	141387	182	1117	00:05:10	310	2019-08-01	1908	4	3	2	8	4
ODm8Q0kPQFU	doctor independent influencer	Doctor Mike Hansen		10 Reasons Male Infertility Keeps Getting Worse	UCMSsLqxqvZsNXi0Z-VjN89A	Mike Hansen, MD, is a medical doctor who is board certified in internal medicine, critical care medicine, and pulmonary disease. He also sees patients in his weight loss clinic, which focuses on lifestyle medicine & disease prevention. His mission is to make a dent in this world by impacting as many people's health and lives as possible. He intends on doing this by providing people with the most …	US	"dr. mike hansen (pulmonologist)" "dr. mike hansen internal medicine" "mike hansen md" "doctor mike youtube" "dr. mike" "doctor mike hansen wiki" "doctor mike hansen instagram" "doctor mike hansen pulmonologist" "dr. mike hansen bio" "dr. mike hansen instagram" "dr mike hansen videos" "mike hansen md pulmonary" "mike hansen youtube" "doctor mike youtube channel" "dr. mike hansen md" "doctor mike …	1160000	11843	59	491	00:05:06	306	2023-04-03	567	4	3	2	8	4
ODm8Q0kPQFU	special clinic	Indore Infertilty Clinic	Konuşma yok	Inside the IVF Lab | Journey of an Oocyte & Sperm during IVF Process | OPU, Fertilization & ET	UCBLXWOPyodn08EFbN5Lh3iA	Welcome to our YouTube Channel ! The premier destination for infertility solutions in Indore, Madhya Pradesh. If you're seeking support, guidance, and expert knowledge on your journey towards parenthood, you've come to the right place. Our channel is dedicated to providing valuable information. Join our community of compassionate professionals & fertility experts. Subscribe now for educational vi…	IN	"best ivf centre indore" "ivf indore" "icsi treatment indore" "ivf treatment indore" "male infertility treatment indore" "low cost ivf indore" "highest success rate ivf treatment indore" "guaranteed ivf treatment indore" "best infertility specialist indore" "best ivf doctor indore" "dr gajendra tomar indore" "doel bose" "best embryologist indore" "best ivf lab indore" "best ivf success rate" "bes…	5840	74859	24	545	00:04:58	298	2020-10-06	1476	3	3	2	10	4
6dfsWVvgZZM	news/media	TODAY	Haber	What is male factor infertility, and how can it be treated?	UChDKyKQ59fYz3JO2fl0Z6sg	TODAY brings you the latest headlines and expert tips on parenting, food, home, style, and health and wellness.	N/A	TODAY "the today show" "today show" "Matt Lauer" "Savannah Guthrie" "Al Roker" "Natalie Morales" "Willie Geist"	4640000	39120	79	512	00:04:57	297	2024-04-26	178	4	4	2	8	4
9eObrwppVSc	news/media	TIME		Inside the IVF Testing Debate	UC8Su5vZCXWRag13H53zWVwA	TIME brings unparalleled insight, access and authority to the news. A 24/7 news publication with more than a century of experience, TIME’s coverage shapes how we understand our world. Subscribe for daily news, interviews, science, technology, politics, health, entertainment, and business updates, as well as exclusive videos from TIME’s Person of the Year, TIME 100 and more created by TIME’s accla…	US	Time "time magazine" magazine "time (magazine)" time.com "news today" "world news" interview science technology health politics entertainment business news "breaking news" live lifestyle video	1360000	29382	23	149	00:04:52	292	2022-09-08	774	4	4	2	8	4
KxaC8fjegXA	news/media	Good Morning America		What to know about male infertility l GMA	UCH1oRy1dINbMVp3UFWrKP0w	Every weekday 7 a.m. - 9 a.m. Good Morning America brings you the latest breaking news, expert analysis, helpful advice for everyday living, recipes from the best chefs in the country and live performances from the best musicians on television.	US	gma good morning america GMA news "robin roberts" "michael strahan" "George Stephanopoulos" "ginger zee" "lara spencer" "amy robach" "abc news" "good morning america" "morning TV" "broadcast TV" strahan Stephanopoulos "morning television" "pop news" "entertainment news" "breaking news" "rob marciano" "morning show" entertainment abc "good morning" "tj holmes" "jennifer ashton" GMA3 "sam champion"…	5160000	45399	92	460	00:04:44	284	2019-04-23	2008	4	4	2	8	4
NdtOPOGM7A4	news/media	CBS Mornings		First baby born through controversial IVF treatment draws attention	UC-SJ6nODDmufqBzPBwCvYvQ	Each weekday morning, "CBS Mornings” co-hosts Gayle King, Tony Dokoupil and Nate Burleson bring you the latest breaking news, smart conversation and in-depth feature reporting. Watch "CBS Mornings" on weekdays at 7 a.m. ET on CBS and stream it at 8 a.m. ET on the CBS News app. For licensing inquiries, contact: licensing@veritone.com	N/A	N/A	3070000	69903	38	231	00:04:35	275	2015-05-08	3454	4	4	2	8	4
fnYBLYfFx2Y	hospital	Cleveland Clinic	Kaynak kullanmış	How Does In Vitro Fertilization (IVF) Work? A Step-by-Step Explanation	UCxyiSz4m161Z6frOsFxJpgw	Cleveland Clinic is a nonprofit multispecialty academic medical center. Founded in 1921, it is dedicated to providing quality specialized care and includes an outpatient clinic, a hospital with more than 1,000 staffed beds, an education division and a research institute.	US	"cleveland clinic" hospital health medical healthcare heart cardiology urology "top hospitals" "every care in the world" cancer "heart surgery" diabetes endocrinology "ear nose and throat" "digestive disorders" geriatrcis obgyn "kidney disorders" neurology opthalmology orthopedics pulmonary rheumatology "number 1 heart care" "tom mihaljevic" "world class care" mycologist doctormaxshrooms Obigho	596000	1712617	520	7522	00:04:34	274	2022-11-16	705	5	5	3	10	4
YWrgyHn0VSY	news/media	BBC Earth Science		How IVF Works | The Story of Fertility | BBC Earth Science	UCdsOTr6SmDrxuWE7sJFrkhQ	BBC Earth Science explores the science of the world around us – and beyond. Our mission is to delve into unique and thought-provoking topics, offering insights into the unusual, the unseen, and the unexplained, while challenging audience perceptions and broadening horizons. Don’t forget to check out: http://www.youtube.com/bbcearth This is a commercial channel from BBC Studios.	GB	earthlab "earth Lab" "bbc earth lab" Headsqueeze "brit lab" science physics Chemistry "Greg Foot" "James May" "Dom Burgess"	1530000	51150	71	714	00:04:02	242	2024-06-01	142	4	4	2	8	4
v52KEBgG6JI	non-government organization	Doctors' Circle World's Largest Health Platform	Hastane ve doktor reklamı	Difference between IVF & ICSI Procedure | Are IVF Babies Healthy?- Dr.Sneha Shetty | Doctors' Circle	UCJY1JCVsIgVgN5ePERZ_Upg	We at Doctors' Circle never forget our purpose: helping millions of people make critical health and wellness choices that can improve the quality of their lives. We believe that credible health information means better awareness, better behavior, better treatment, and ultimately greater health and well-being. We are relentless in our quest to deliver powerful and effective work for our viewers.	IN	N/A	2210000	20749	20	165	00:03:50	230	2023-05-19	521	4	4	2	8	4
FZ7TVRpZspI	non-government organization	Doctors' Circle World's Largest Health Platform	Hastane ve doktor reklamı	Stem Cell Therapy for Ovarian Rejuvenation|Infertility Treatment - Dr. Rashmi Yogish|Doctors' Circle	UCJY1JCVsIgVgN5ePERZ_Upg	We at Doctors' Circle never forget our purpose: helping millions of people make critical health and wellness choices that can improve the quality of their lives. We believe that credible health information means better awareness, better behavior, better treatment, and ultimately greater health and well-being. We are relentless in our quest to deliver powerful and effective work for our viewers.	IN	N/A	2210000	13131	46	109	00:03:49	229	2023-02-22	607	4	4	2	8	4
kSkcjrlSL1c	non-government organization	Doctors' Circle World's Largest Health Platform	Hastane ve doktor reklamı	Infertility treatment for polycystic ovary syndrome PCOS - Dr. Anitha Prasad	UCJY1JCVsIgVgN5ePERZ_Upg	We at Doctors' Circle never forget our purpose: helping millions of people make critical health and wellness choices that can improve the quality of their lives. We believe that credible health information means better awareness, better behavior, better treatment, and ultimately greater health and well-being. We are relentless in our quest to deliver powerful and effective work for our viewers.	IN	N/A	2210000	37217	18	158	00:03:43	223	2015-08-23	3347	4	4	2	8	4
Hr4WJddQwiU	doctor independent influencer	Dr Jay Mehta’s Fertility & Endometriosis Clinic	Hastane ve doktor reklamı	Are IVF babies smarter? | Are Babies born through IVF different? | Dr Jay Mehta: Shree IVF Clinic	UCpET7w-LPvJloZWO75c1zZA	Dr Jay Mehta is the Scientific Director of Shree IVF Clinic, a Luxury Facility for Advanced Assisted Reproduction and Advanced Pelvic Surgery in Mumbai, India. The clinic is extremely well known for the limited use of DONOR Program. He strongly believes in the fact that Knowledge should be for Free and should be accessible to all the members of the medical fraternity. Dr Jay Mehta is a widely fol…	IN	"in vitro fertilisation" hysterectomy "overian cysts" "ivf treatment" "infertility treatment" endometriosis "ivf clinic" "ivf specialist" "pregnancy expert" "Successful ivf centre" "Laparoscopic surgoen" "female reproductive health" "fertility doctor" azoospermia aspermia gynaecologist "female health" "female infertility treatments" "male infertility treatments" "zero sperm count treatment" "uter…	378000	2751	26	39	00:03:42	222	2024-02-15	249	4	4	2	8	4
g0MR8LFDMbs	doctor independent influencer	Anu Kathiresan MD	Hastane reklamı	CAUSES OF INFERTILITY- IS THIS A MALE OR FEMALE PROBLEM?	UCUetRFUJs7yZUT0AQAmknnA	Welcome to my channel! I'm Anu Kathiresan, and I'm a board certified Fertility Specialist in Los Angeles, CA. I share fertility education and life as a doctor mom via vlogging on YouTube, dancing on TikTok, and Instagramming. New videos go live every Sunday! Come say hi on other social media platforms (Instagram, TikTok, Facebook)! See links below.	US	infertility fertility ttc "trying to conceive" "fertility physician" "advice on how to get pregnant"	38200	2763	27	82	00:03:38	218	2020-09-13	1499	4	4	2	8	4
GBRYeeveZF8	non-government organization	Doctors' Circle World's Largest Health Platform	sıkıcı ve arka planda gürültü	Signs & symptoms of male infertility - Dr. Vasan S S	UCJY1JCVsIgVgN5ePERZ_Upg	We at Doctors' Circle never forget our purpose: helping millions of people make critical health and wellness choices that can improve the quality of their lives. We believe that credible health information means better awareness, better behavior, better treatment, and ultimately greater health and well-being. We are relentless in our quest to deliver powerful and effective work for our viewers.	IN	N/A	2210000	27118	15	136	00:03:16	196	2016-06-06	3059	4	4	2	8	4
xW5-CrIAwjs	news/media	TODAY		First ‘Test Tube Baby’ Louise Brown Turns 40: A Look Back | TODAY	UChDKyKQ59fYz3JO2fl0Z6sg	TODAY brings you the latest headlines and expert tips on parenting, food, home, style, and health and wellness.	N/A	TODAY "the today show" "today show" "Matt Lauer" "Savannah Guthrie" "Al Roker" "Natalie Morales" "Willie Geist"	4640000	112428	54	689	00:03:09	189	2018-07-25	2280	4	4	2	8	4
4CxNeiAICmc	independent influencer	Freesciencelessons	Açıklama güncel değil	GCSE Biology Revision &quot;Hormones to Treat Infertility&quot;	UCqbOeHaAUXw9Il7sBVG3_bw	Workbooks for schools from 40p per copy. https://www.freesciencelessons.co.uk/school-licences/	GB	GCSE revision science biology chemistry physics	828000	266647	60	0	00:03:09	189	2018-04-19	2377	2	3	2	8	4
9PNWg_-N3ao	non-government organization	Doctorpedia	Dectorpedia reklamı	IVF PROCESS: HELPFUL STEP BY STEP GUIDE (In Vitro Fertilization)	UCdffQ5SsQaXnHDC1TSoF54w	At Doctorpedia, we believe that when it comes to learning about our health, the doctors’ voices should be the most prominent in the room. We have produced over 6,000 clear and concise videos with 10 million+ engagements across our digital platforms. We are passionate about improving doctor-patient communication and support our doctor community with products that help them reach, educate, and empo…	US	"health knowledge" "patient education" "health and wellness" "health tips" doctorpedia "covid 19" "covid vaccine" "covid vaccine for kids" "covid vaccine for 5-11" "mental health" Narcissism "health shorts" "youtube health"	46200	42698	11	168	00:03:06	186	2022-06-23	851	3	4	2	8	4
VGKv8Ql5P5Q	doctor independent influencer	Infertility TV	Hastane ve kendi reklamı	IVF Procedure - How Long Does It Take? | InfertilityTV	UCNdUjmPUmBIKuHB3uOq5S3g	Infertility TV is your trusted source for reliable, accurate answers to questions about infertility and miscarriage. Infertility TV is hosted by Dr. Randy Morris MD, America's Most Trusted Fertility Expert. Dr. Morris is Board Certified in Reproductive Endocrinology and Infertility and Obstetrics and Gynecology by the American Board of Obstetrics and Gynecology (ABOG). Click the ABOG link below f…	US	IVF "in vitro fertilization" Infertility fertility PGD "Dr Randy Morris" "Randy Morris MD" "fertility expert" PCOS Crinone Clomid Endometriosis TTC "Trying to Conceive" "TTC Tips" "Chicago IVF" "Illinois IVF" "IVF Success" "IVF Journey" "IVF treatment" "Fertility treatment" PGT	284000	39247	13	437	00:02:53	173	2018-10-12	2201	3	3	2	8	4
BtjBACiavq4	news/media	CBS Evening News		The challenges of in-vitro fertilization	UCAeWdyKJXGWmVAXFpgLNNTg	"CBS Evening News with Norah O'Donnell" delivers the latest news and original reporting, and goes beyond the headlines with context and depth. Watch "CBS Evening News" on weekdays at 6:30 p.m. ET on CBS and stream it at 10 p.m. ET on the CBS News app. For licensing inquiries, contact: licensing@veritone.com	N/A	N/A	2120000	6577	11	55	00:02:48	168	2023-03-20	581	3	3	2	8	4
pUr_-ZtKfkw	doctor independent influencer	Infertility TV	Hastane ve kendi reklamı	Infertility Treatment for Women - Fertility Drugs - Infertility TV	UCNdUjmPUmBIKuHB3uOq5S3g	Infertility TV is your trusted source for reliable, accurate answers to questions about infertility and miscarriage. Infertility TV is hosted by Dr. Randy Morris MD, America's Most Trusted Fertility Expert. Dr. Morris is Board Certified in Reproductive Endocrinology and Infertility and Obstetrics and Gynecology by the American Board of Obstetrics and Gynecology (ABOG). Click the ABOG link below f…	US	IVF "in vitro fertilization" Infertility fertility PGD "Dr Randy Morris" "Randy Morris MD" "fertility expert" PCOS Crinone Clomid Endometriosis TTC "Trying to Conceive" "TTC Tips" "Chicago IVF" "Illinois IVF" "IVF Success" "IVF Journey" "IVF treatment" "Fertility treatment" PGT	284000	44299	27	492	00:02:37	157	2018-11-02	2180	3	3	2	8	4
Jn4yVo_SxY8	news/media	Al Jazeera English	Bu videoda pahalı olan prosedürü daha ucuz yapmak için çalışan bir doktor var ancak güncelleme yok.	South African doctor develops cheaper IVF treatment	UCNye-wNBqNL5ZzHSJj3l8Bg	#AlJazeeraEnglish, we focus on people and events that affect people's lives. We bring topics to light that often go under-reported, listening to all sides of the story and giving a 'voice to the voiceless.' Our impartial, fact-based reporting wins worldwide praise and respect. It is our unique brand of #journalism that the world has come to rely on. We are reshaping global media and constantly wo…	QA	"al jazeera" "aljazeera live" "al jazeera live" "al jazeera english" aljazeera "aljazeera english" "middle east news" "Breaking news" "aljazeera now" "latest news" "news hour" "english new" "world news english" "english news" "english news live" "international news" "english bulletin" "al jazeera live" "al jazeera" "aljazair news live" "al jazeera english" aljazeera "al jazeera news" "english new…	15000000	107493	240	1174	00:02:33	153	2016-12-21	2861	2	2	2	8	3
sYc2XpJgr6g	news/media	Good Morning America		New study looks at the link between IVF and child cancer | GMA	UCH1oRy1dINbMVp3UFWrKP0w	Every weekday 7 a.m. - 9 a.m. Good Morning America brings you the latest breaking news, expert analysis, helpful advice for everyday living, recipes from the best chefs in the country and live performances from the best musicians on television.	US	gma good morning america GMA news "robin roberts" "michael strahan" "George Stephanopoulos" "ginger zee" "lara spencer" "amy robach" "abc news" "good morning america" "morning TV" "broadcast TV" strahan Stephanopoulos "morning television" "pop news" "entertainment news" "breaking news" "rob marciano" "morning show" entertainment abc "good morning" "tj holmes" "jennifer ashton" GMA3 "sam champion"…	5160000	6103	14	34	00:02:29	149	2019-04-02	2029	4	4	2	6	4
_WwYB35RrBE	hospital	Cloudnine Hospitals	Açıklama çok az	What are the common signs of infertility in women? | Cloudnine Hospitals	UCIWk3GU6mrMAXBd1_EX2POw	Cloudnine Hospital is India's premier destination for birthing, women's health and child care services. With 29 centres across 12 cities and more than 1,50,000 healthy deliveries, Cloudnine is the nation's leading maternity, paediatric and fertility hospital. We have the best neonatal care & specialists too. We offer comprehensive services, a team of skilled specialists, state-of-the-art faciliti…	IN	Maternity Pregnancy Mothers	128000	74939	42	444	00:02:29	149	2019-03-08	2054	3	4	1	8	4
2E5j5iYBSOE	doctor independent influencer	Dr. Kaberi Banerjee	video adı ingilizce değil (İngilizce de yazılmış)	IVF क्या है और कैसे किया जाता है ? | IVF Process Step by Step in Hindi | Dr. Kaberi Banerjee	UCV9OYbziqLUJ9gqVtujkouA	About Dr. Kaberi Banerjee A seasoned Obstetrician & Gynecologist with more than a decade of experience in IVF infertility management, Dr. Kaberi Banerjee is renowned infertility and IVF specialist in Delhi & NCR. Dr. Banerjee is the Medical Director of Advance Fertility & Gynecological Center, New Delhi, and has handled more than 10,000 plus pregnancy cases so far. Her expertise lies in successfu…	IN	"ivf doctor" "ivf specialist" "infertility doctor" "surrogacy doctor" "fertility expert" "ivf expert" "ivf consultant" "fertility doctor" "obstetrician and gynecologist" "infertility specialist"	18700	391715	576	0	00:02:17	137	2019-09-17	1861	3	3	2	8	4
mZ4saCttKzU	doctor independent influencer	IVF Specialist in India - Dr.Aniruddha Malpani	Yapay zeka seslendirmesi	Know why IVF babies are smarter than other babies? | IVF baby | IVF Treatment	UCR_c0AP6YyfHxSQZksd534g	Malpani infertility clinic, Dr. Aniruddha and Dr. Anjali Malpani provides best IVF treatment at affordable IVF prices in a comfortable atmosphere.Our IVF clinic is perceived by the Govt of India and is enlisted under the National Registry of ART Clinics in India of ICMR. Since 1991, we have been performing 300 IVF cycles every year and are offering all the newest reproductive techniques. Our serv…	IN	"IVF Treatment" "Ivf Clinic in India" "Ivf clinic in Mumbai" "In Vitro Fertilization" "IVF Cost" "Ivf cost in India" infertility pregnancy "fertility treatment" icsi "ivf process" "cost of ivf" "dr aniruddha malpani" "malpani infertility clinic" "ivf procedure" "meaning of ivf" "ivf failed" "failed ivf" "ivf in india" "ivf in mumbai" ivf pregnancy "infertility clinic" "embryo transfer" "best ivf …	100000	8310	11	53	00:02:14	134	2023-03-17	584	2	2	2	3	4
CoebQxE1CIg	government organization	Healthy Male	Bağış yapabileceğin bir sağlık sitesi reklamı	Male infertility - Symptoms and causes | Healthy Male	UCqO6Y2EtVjvJilzKNIF3E6w	Healthy Male is a national organisation that helps men and boys lead healthier lives by providing evidence-based, easy-to-understand information on men’s health topics. Their aim is to make information available to everybody, regardless of gender, age, education, sexual orientation, religion, or ethnicity. Supported by the Australian Government Department of Health, Healthy Male collaborates with…	AU	"Andrology Australia" "men's health" "prostate cancer" "testicular cancer" "male infertility" testosterone androgens "Healthy Male" "reproductive health" "sexual health"	6260	84397	22	544	00:02:11	131	2019-10-08	1840	2	2	2	3	4
jCZqbh5w1go	doctor independent influencer	Spring Fertility	Açıklama çok az	IVF Explained: How the egg retrieval process works	UCeuUJwfQ3tHxgCmpKJb8O_A		N/A	N/A	934	329161	124	1328	00:02:07	127	2019-06-05	1965	3	3	1	8	4
xpF9p4pTqk4	non-government organization	Doctors' Circle World's Largest Health Platform	Hastane ve doktor reklamı	Causes of Male Infertility - Dr. Prathiba Govindaiah	UCJY1JCVsIgVgN5ePERZ_Upg	We at Doctors' Circle never forget our purpose: helping millions of people make critical health and wellness choices that can improve the quality of their lives. We believe that credible health information means better awareness, better behavior, better treatment, and ultimately greater health and well-being. We are relentless in our quest to deliver powerful and effective work for our viewers.	IN	N/A	2210000	24470	14	202	00:02:02	122	2019-03-22	2040	4	4	2	8	4
mFONFms43BQ	non-government organization	Doctors' Circle World's Largest Health Platform	Hastane ve doktor reklamı	Female infertility approach in Ayurveda - Dr. Shubha Ural	UCJY1JCVsIgVgN5ePERZ_Upg	We at Doctors' Circle never forget our purpose: helping millions of people make critical health and wellness choices that can improve the quality of their lives. We believe that credible health information means better awareness, better behavior, better treatment, and ultimately greater health and well-being. We are relentless in our quest to deliver powerful and effective work for our viewers.	IN	N/A	2210000	27592	22	143	00:01:40	100	2019-10-17	1831	3	3	2	8	4
yPW0S-5xui8	non-government organization	Instituto Bernabeu	başka bir dilin üzerine ingilizce seslendirme	Causes of infertility and male sterility	UCuisbU8KKaMi4sGWt4ZmWlg	www.institutobernabeu.com Medicina reproductiva adaptada a ti. Pide tu cita en cualquiera de nuestras clínicas situadas en Alicante, Elche, Cartagena, Albacete, Madrid Velázquez, Madrid Ayala, Palma de Mallorca y Venezia.	ES	Clinica reproducción asistida Alicante Ginecología Fertilidad FIV Fecundación In Vitro Donación ovocitos	87800	5387	48	10	00:01:35	95	2018-06-21	2314	3	4	2	8	4
Qtl52ryRuZ8	independent influencer	Fertility Solutions	Videoda konuşma yok	Seven Signs of Infertility in Women	UCM6w7s5Tvfj9GkC0eMfCiwA	Fertility Solutions was founded by Leigh-Ann Geydien. Having to deal with my PCOS and infertility since the age of 16, I saw the need for more valuable information for couples experiencing infertility. My journey and seeking advice as well as helpful products wasn’t always easy. It was during this period of my life that I decided that something needed to be done – a one-stop shop and advice platf…	ZA	Infertility fertility pcos endometriosis "fertility treatment" ivf "fertility treatment" HSG "egg retrieval" "egg donation" "age and infertility" IVF ICSI IUI fibroids cysts	1030	86558	12	365	00:01:25	85	2020-08-17	1526	2	2	1	8	3
NUaH5mFBi2A	doctor independent influencer	Dr. Paulien Moyaert	Yapay zeka seslendirmesi	How IVF works | 3D Animation	UCAFloV5cA8Pcrq454yVHqjA	Are you also here because it seems that YouTube can explain things better than your teacher? You're not alone - welcome to the club! I'm Dr. Paulien Moyaert, a former medical student, current PhD candidate, and nuclear medicine resident. Throughout my nine years of study, I’ve been educated by many renowned teachers. What I noticed year after year was that the more they knew about their field, th…	BE	Medicine "educational videos" health "human body" physiology anatomy gynaecology "internal medicine" cardiology "medical animations" animations 3D "medical educational videos" "animated science lectures" science nursing "medical school" biology "patient education" patient "medical knowledge" cardiology "internal medicine" surgery "health literacy" pharmaceutical "Nucleus Medical Media" "Dandelion…	248000	936457	139	2619	00:01:15	75	2022-12-16	675	2	2	1	8	4
8ey6Bw2yUzM	non-government organization	Instituto Bernabeu	başka bir dilin üzerine ingilizce seslendirme	IVF PROCESS STEP BY STEP (In Vitro Fertilisation): Embryo transfer	UCuisbU8KKaMi4sGWt4ZmWlg	www.institutobernabeu.com Medicina reproductiva adaptada a ti. Pide tu cita en cualquiera de nuestras clínicas situadas en Alicante, Elche, Cartagena, Albacete, Madrid Velázquez, Madrid Ayala, Palma de Mallorca y Venezia.	ES	Clinica reproducción asistida Alicante Ginecología Fertilidad FIV Fecundación In Vitro Donación ovocitos	87800	2829276	166	4605	00:01:13	73	2016-04-14	3112	2	1	1	8	4
Ww-x-VIFh-Q	medical organization	American Chemical Society	Kaynak kullanmış	Spermbot could help solve male infertility - Headline Science	UCBNvvmhKeuZZhWCA7Yddkig	Science videos with a focus on chemistry from the American Chemical Society (ACS), one of the world’s largest scientific societies. ACS is a global leader in providing access to chemistry-related information and research through its multiple databases, peer-reviewed journals and scientific conferences. Join the #AmericanChemicalSociety https://bit.ly/Join_ACS	US	chemistry science research acs es&t american chemical society biology biochemistry physics "american chemical society" "chemical engineering"	70200	273999	100	628	00:01:11	71	2016-01-12	3205	2	2	2	10	4
v1M5ZqTIeTw	non-government organization	Instituto Bernabeu	başka bir dilin üzerine ingilizce seslendirme	IVF PROCESS STEP BY STEP (In Vitro Fertilisation): Embryo cultivation	UCuisbU8KKaMi4sGWt4ZmWlg	www.institutobernabeu.com Medicina reproductiva adaptada a ti. Pide tu cita en cualquiera de nuestras clínicas situadas en Alicante, Elche, Cartagena, Albacete, Madrid Velázquez, Madrid Ayala, Palma de Mallorca y Venezia.	ES	Clinica reproducción asistida Alicante Ginecología Fertilidad FIV Fecundación In Vitro Donación ovocitos	87800	936659	142	1938	00:01:04	64	2016-04-14	3112	2	1	1	8	4
yFoZEAVfeYI	non-government organization	IVIRMA Global	Hastane reklamı	What are the main causes of female infertility? | Dr. Mireia Galian	UC_1LzwEMFoF575PFC74x2OQ	Canal corporativo de IVI donde podrás visualizar todo el material audiovisual de nuestras clínicas de reproducción asistida. España, UE, 2014. http//ivi.es Por otro lado, como especialistas en reproducción asistida conocemos a los ginecólogos generales más recomendados. Puedes buscar a tu ginecólogo más cercano en http://www.ginecologosdeconfianza-ivi.es/	ES	"reproduccion asistida" "fecundacion in vitro" "inseminacion artificial" ovodonación	23100	10237	20	53	00:01:03	63	2019-09-27	1851	2	2	2	8	3
vwzr_c8CEUA	non government organization	Best Fertility Center	not english	How IUI Treatment Works For Pregnancy | Fertility Tips In Telugu | Ferty9 #shorts #iuitreatment	UCWiSol77SVvIuidTRHFGgKQ	Dear Friends, Ferty9 Fertility Center is a hospital set up by highly experienced doctors & gynecologists with more than 25 years of experience to serve those with infertility issues, nationally and globally. It is a highly reliable center and is also recommended by many couples who have successfully attained parenthood. We follow the guidelines of Indian Council of Medical Research [ICMR] quite s…	IN	"pregnancy week by week" "early pregnancy symptoms" "early miscarriage" "trying to conceive" "home pregnancy test" "pregnancy test at home" "how to do pregnancy test" "how to get pregnant fast tips in telugu" "Pregnancy Care Tips" "pregnancy ela vastundi telugu lo" "pregnancy tips in telugu" "tips for normal delivery in pregnancy" "Pregnant Women Health Tips" "ferty9 hospitals" "Natural pregnancy…	233000	18750	23	493	00:01:00	60	2023-11-19	337
